# Supplementary material for: An Online Ethics Curriculum for Short-Term Global Health Experiences: Evaluating a Decade of Use
Source: PubMed Central journal article supplement (PMC9414809; doi:10.5334/aogh.3716), 2022-08-26
Supplement: agh-88-1-3716-s1.pdf [file agh-88-1-3716-s1.pdf]

**Supplementary Figure 1.** Open user anonymous demographic survey.

**About You**

1. Are you male or female?

- Male
- Female

2. How old are you?

3. What is your race/ethnicity?

- American Indian or Alaska Native
- Asian
- Black or African American
- Native Hawaiian or Other Pacific Islander
- White
- Mixed
- Other (please specify)

4. Are you of Hispanic, Latino, or Spanish Origin?

- No
- Yes – Mexican or Mexican-American, Chicano
- Yes – Puerto Rican
- Yes – Cuban
- Yes - Another (please specify)

5. What is your nation of citizenship?

- United States
- Other (please specify)

6. What level of education have you achieved up till now? (Select the highest achieved)

- High School
- Vocational School
- Bachelor's Degree/University
- Master's Degree
- Doctorate
- None of the above

7. If you are currently in a degree granting program, what degree are you pursuing?

- High School
- Bachelor's Degree/University
- Master's Degree
- Doctorate
- Not applicable (currently practicing in my field)
- Other (please specify)

8. What specialty or field do you consider your main vocation?

- Basic Science
- Engineering
- Health Policy
- International Development/Aid
- Medicine
- Nursing
- Pharmacy
- Physical Therapy
- Physician's Assistant
- Public Health
- Social Sciences

Other (please specify)

**About Your Prior Experience in Global Health**

9. Have you been abroad previously for global health training or service?

Yes

No

10. How many times have you been abroad previously for global health training or service purposes? (If 0, skip to question 13.)

0

1-2

3-5

More than 5

11. On average, how long were these prior trips abroad for global health training or service purposes?

Less than 4 weeks

4-8 weeks

8-12 weeks

Greater than 12 weeks

12. In what regions have you previously traveled for global health training or service purposes? Choose

all that apply.

- Africa
- Americas
- Eastern Mediterranean
- Europe
- Southeast Asia
- Western Pacific
- Other (please specify)

**About Your Next Global Health Training or Service Program**

13. Do you have a future short-term global health training or service program planned? (If “No,” skip to question 16.)

- Yes
- No

**About Your Next Global Health Training or Service Program**

14. Where will this next training or service program be? Choose all that apply.

- Africa
- Americas
- Eastern Mediterranean

- Europe
- Southeast Asia
- Western Pacific
- Other (please specify)

15. How long will this future training or service program be?

- Less than 4 weeks
- 4-8 weeks
- 8-12 weeks
- Greater than 12 weeks

**About Your Prior Experience in Global Health Ethics**

16. Have you had prior global health ethics training?

- Yes
- No

17. Was this prior ethics training directly relevant to short-term training or service abroad?

Yes

No

**About this Introductory Curriculum**

18. Will completion of this curriculum be your only ethics training prior to your next short-term training or service program abroad?

Yes

No

Don't know - unsure what program is planning

Don't know - no program planned

19. Is completion of this curriculum required by your training or service program?

Yes

No

Not applicable - no program planned

20. How did you learn about this curriculum? Choose all that apply.

Referral from a friend or colleague

Through my training program

Web search

Other (please specify)
