# Supplementary material for: An Online Ethics Curriculum for Short-Term Global Health Experiences: Evaluating a Decade of Use
Source: PubMed Central journal article supplement (PMC9414809; doi:10.5334/aogh.3716), 2022-08-26
Supplement: agh-88-1-3716-s2.pdf [file agh-88-1-3716-s2.pdf]

**Supplementary Figure 2.** Case-specific feedback survey questions.

**1. Overall this case was useful preparation for my training abroad.**

- Strongly Disagree       Disagree       Neither agree/disagree       Agree       Strongly Agree

**2. The ethical issues presented in this case...**

|                                                                      | <b>Strongly Disagree</b> | <b>Disagree</b>       | <b>Neither agree/disagree</b> | <b>Agree</b>          | <b>Strongly Agree</b> |
|----------------------------------------------------------------------|--------------------------|-----------------------|-------------------------------|-----------------------|-----------------------|
| ...were new to me.                                                   | <input type="radio"/>    | <input type="radio"/> | <input type="radio"/>         | <input type="radio"/> | <input type="radio"/> |
| ...gave me a strategy for dealing with these ethical issues.         | <input type="radio"/>    | <input type="radio"/> | <input type="radio"/>         | <input type="radio"/> | <input type="radio"/> |
| ...increased my confidence in dealing with these ethical issues.     | <input type="radio"/>    | <input type="radio"/> | <input type="radio"/>         | <input type="radio"/> | <input type="radio"/> |
| ...will improve how I behave during my next training program abroad. | <input type="radio"/>    | <input type="radio"/> | <input type="radio"/>         | <input type="radio"/> | <input type="radio"/> |

**3. Why did you do this case?**

- Requirement of my program
- Thought it would be of personal benefit
- Both

**4. Do you have any recommendations for changing this case?**

Comment on structural (e.g., web design, font, video performance, etc.) and/or substantive (e.g., level of detail, concreteness of strategies, representation of issue) concerns.

**5. Would you recommend this case to a friend?**

Yes  No
